# Supplementary material
Source: publisher figshare collection journal article supplement (https://acs.figshare.com/ndownloader/files/4191289)
Supplement: Supplementary file 1 [file 4191289]

## **Supporting Information**

### **Human Therapeutic Plasma Levels of the Selective Serotonin Reuptake Inhibitor (SSRI) Sertraline Decrease Serotonin Reuptake Transporter Binding and Shelter Seeking Behavior in Adult Male Fathead Minnows**

Theodore W. Valenti Jr<sup>†‡\*</sup>, Georgianna G. Gould<sup>‡</sup>, Jason P. Berninger<sup>||,‡</sup>, Kristin A. Connors<sup>||</sup>, N.

Bradley Keele<sup>||x</sup>, Krista N. Prosser<sup>‡</sup>, and Bryan W. Brooks<sup>†,||,‡</sup>

<sup>†</sup> The Institute of Ecological, Earth, and Environmental Sciences, Baylor University, Waco, Texas 76798, USA, <sup>‡</sup>Department of Environmental Science, Center for Reservoir and Aquatic Systems

Research, Baylor University, Waco, Texas 76798, USA University of Texas Health Science Center at San Antonio, Department of Physiology, MC 7756, 7703 Floyd Curl Dr., San Antonio, TX, 78229, USA, <sup>||</sup>Institute of Biomedical Studies, Baylor University, Waco, Texas 76798, USA,

<sup>x</sup>Department of Psychology and Neuroscience, Baylor University, Waco, Texas 76798, USA

Page S1: Cover page

Page S2: Figure S1.

Page S3: Figure S2

Page S4: Figure S3

Page S5: Figure S4

# Control

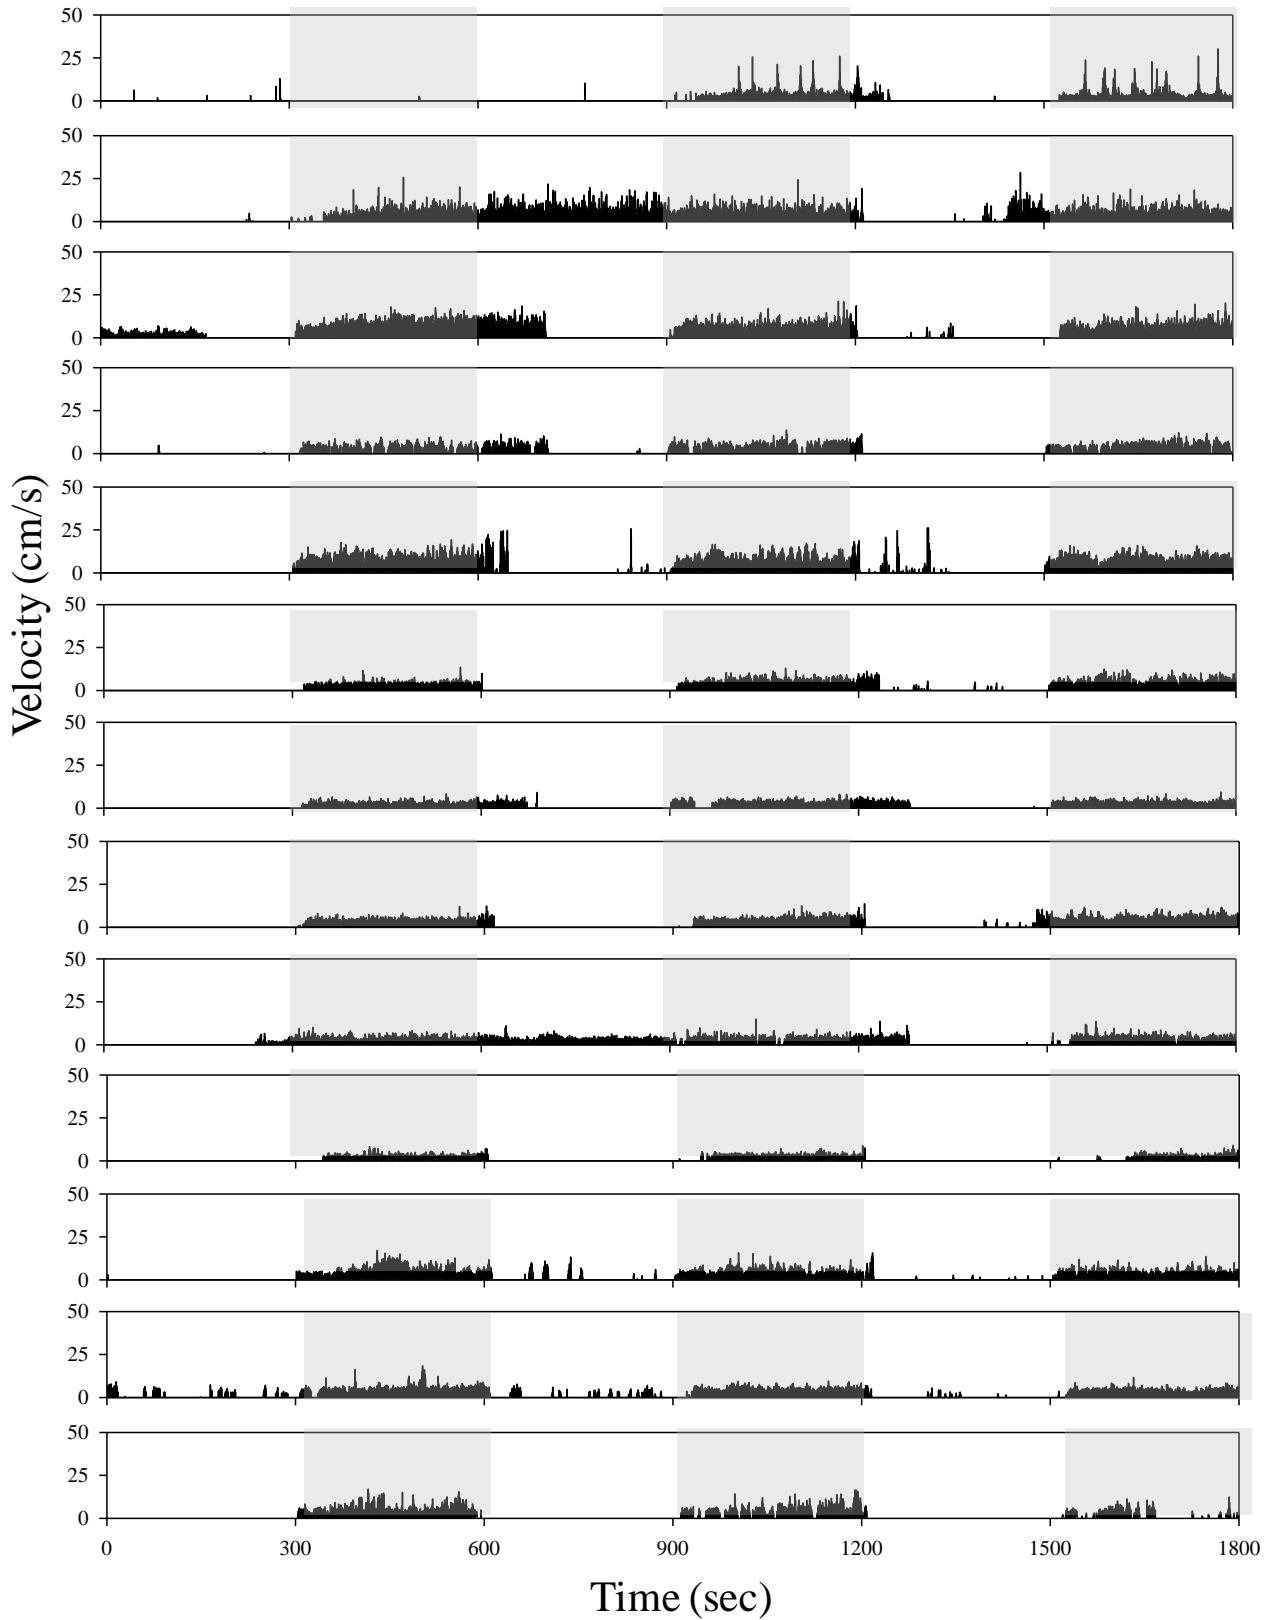

Figure S1. Mean velocities of adult male *Pimphales promelas* in control treatments during behavioral assays. Calculations determined using NOLDUS software. Each graph shows swim patterns for one fish. White= Periods of Light / Gray = Periods of Dark.

# 3 $\mu\text{g}$ sertraline/L

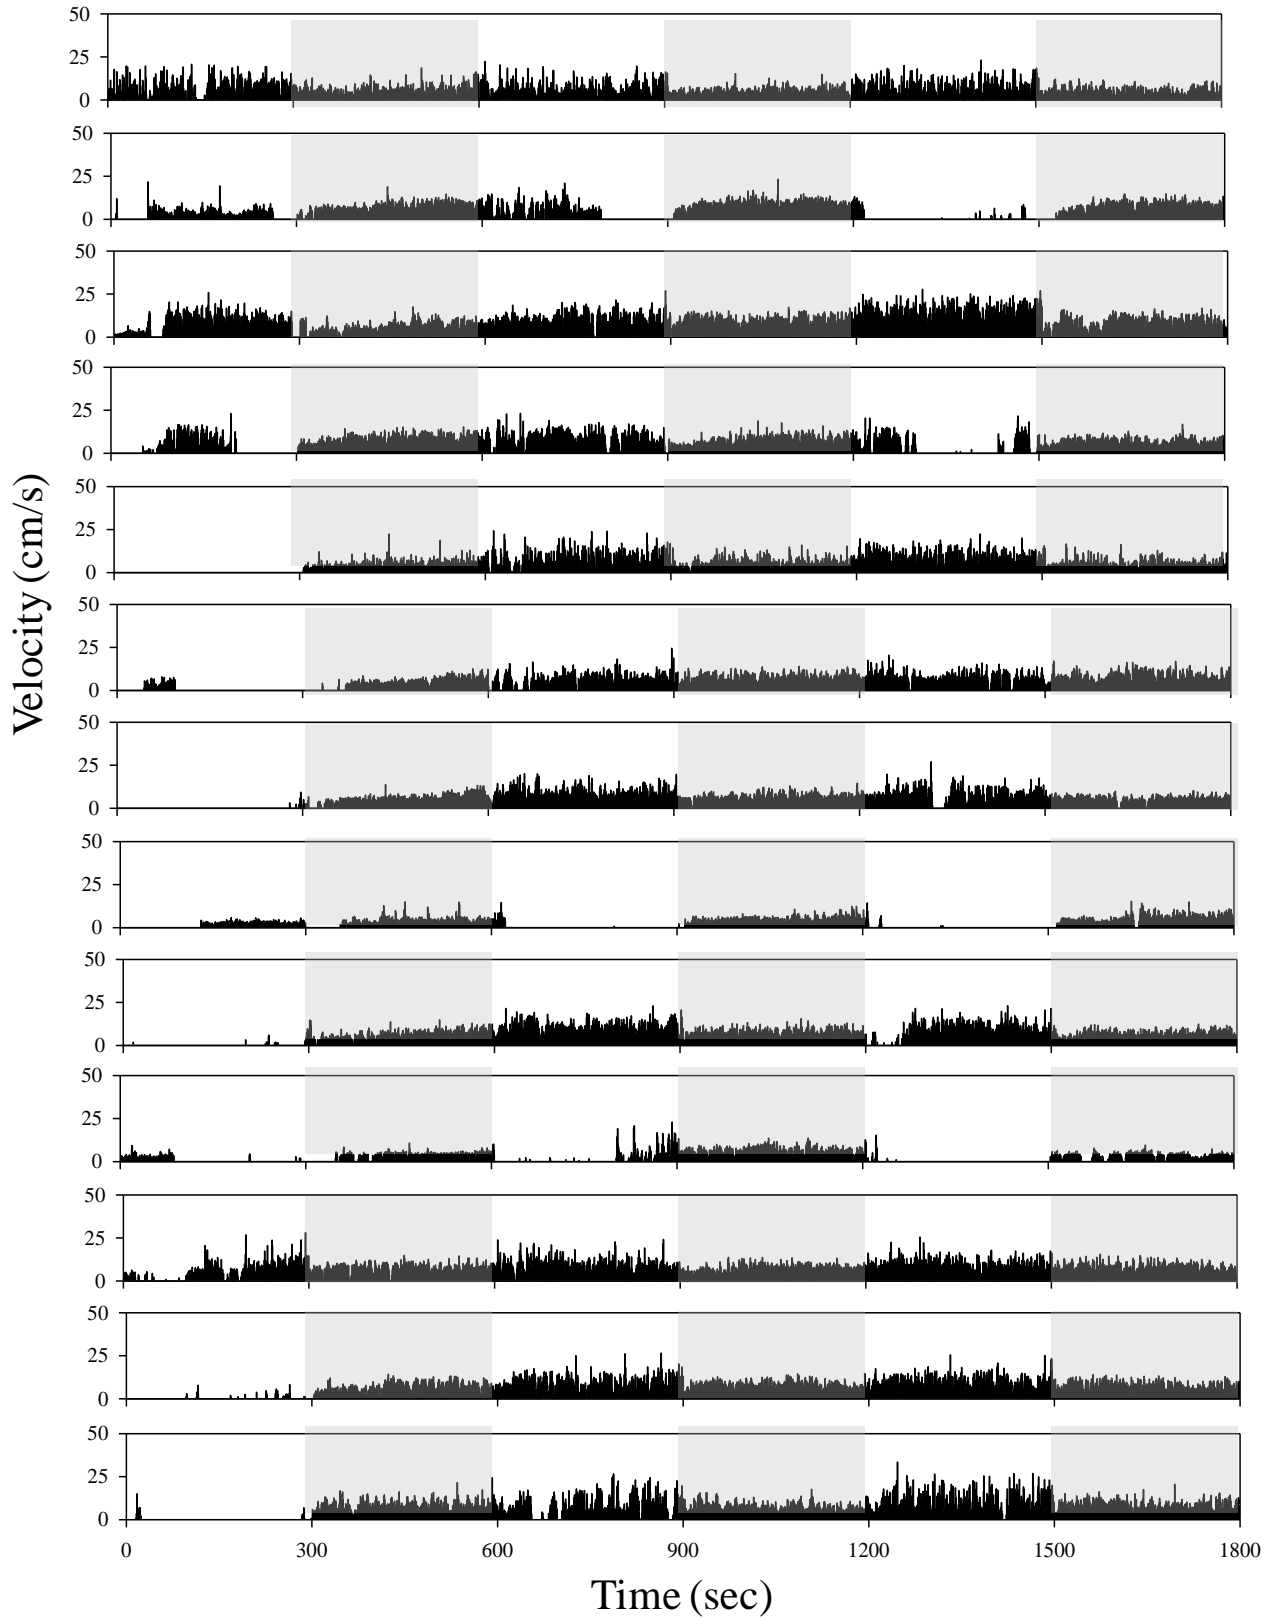

Figure S2. Mean velocities of adult male *Pimphales promelas* exposed to 3  $\mu\text{g}$  sertraline/L during behavioral assays. Calculations determined using NOLDUS software. Each graph shows swim patterns for one fish. White= Periods of Light / Gray = Periods of Dark.

# 10 $\mu\text{g}$ sertraline/L

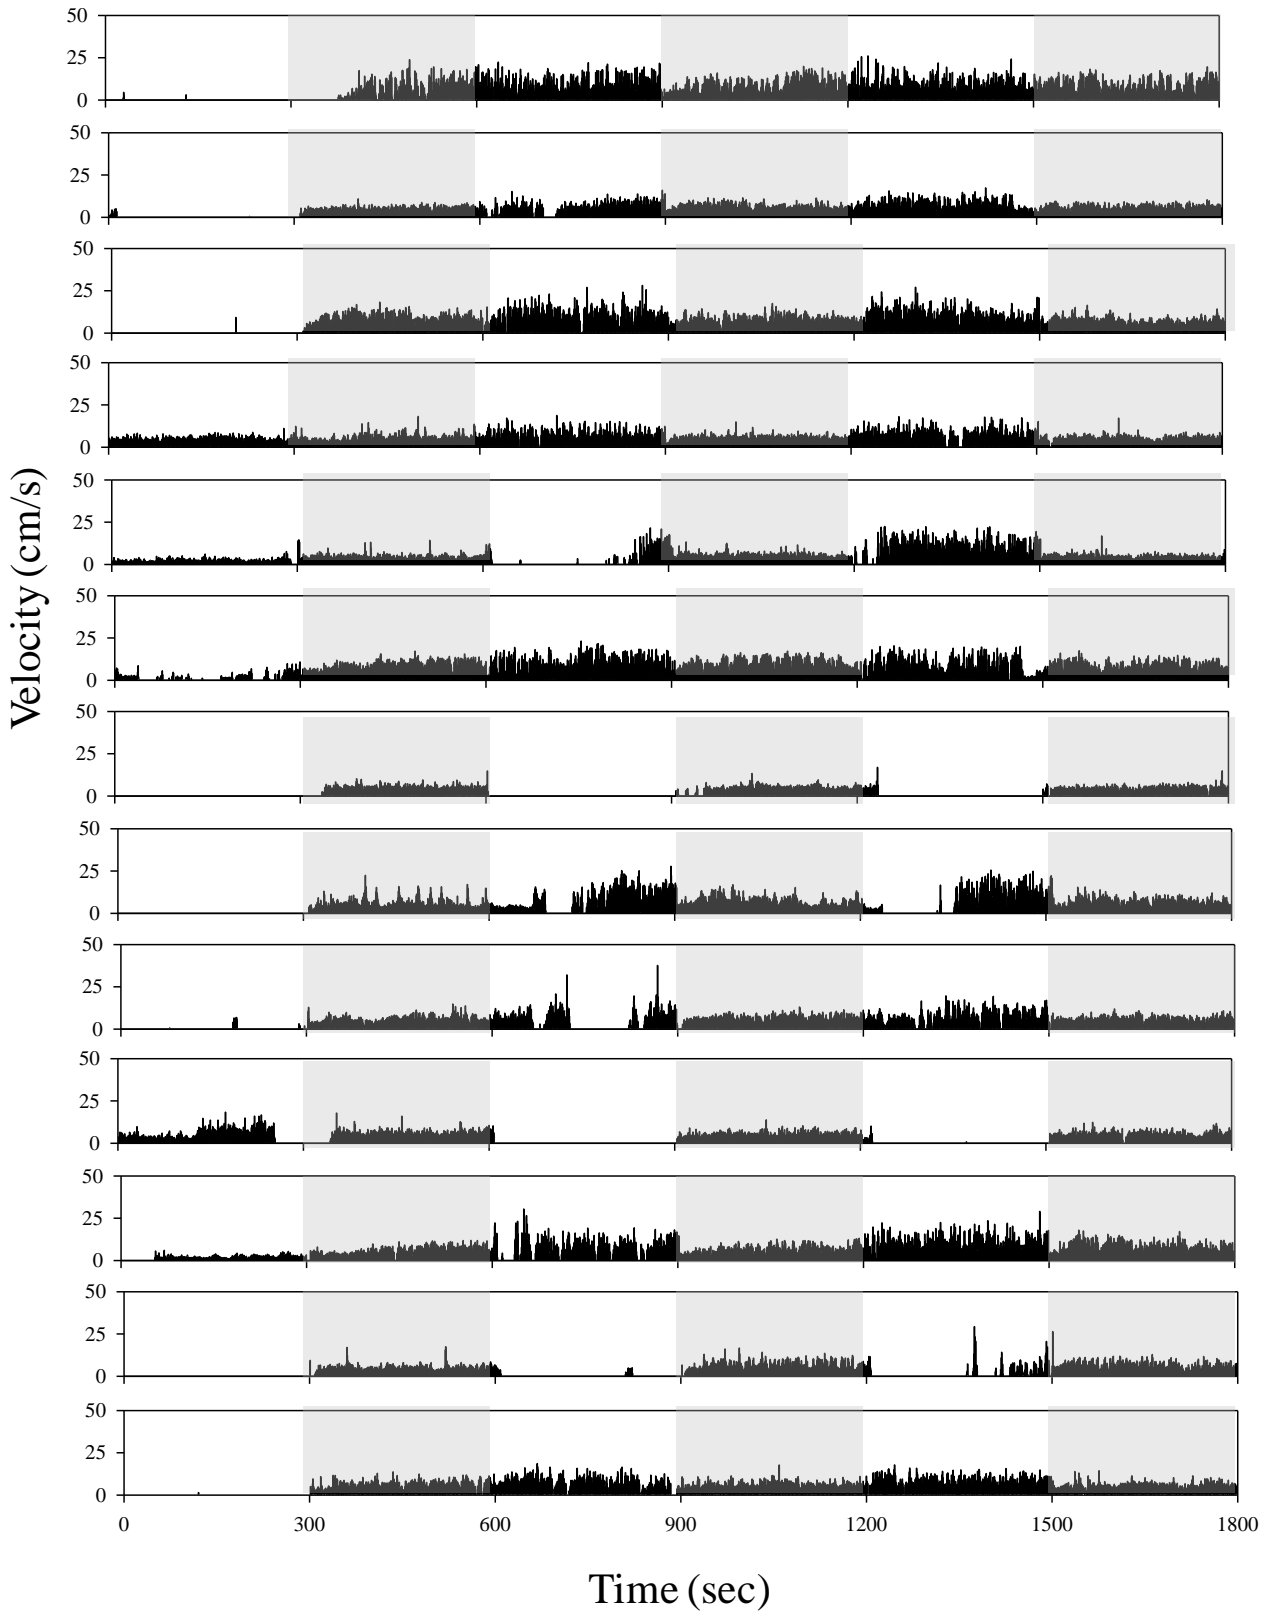

Figure S3. Mean velocities of adult male *Pimphales promelas* exposed to 10  $\mu\text{g}$  sertraline/L during behavioral assays. Calculations determined using NOLDUS software. Each graph shows swim patterns for one fish. White= Periods of Light / Gray = Periods of Dark.

# 30 $\mu\text{g}$ sertraline/L

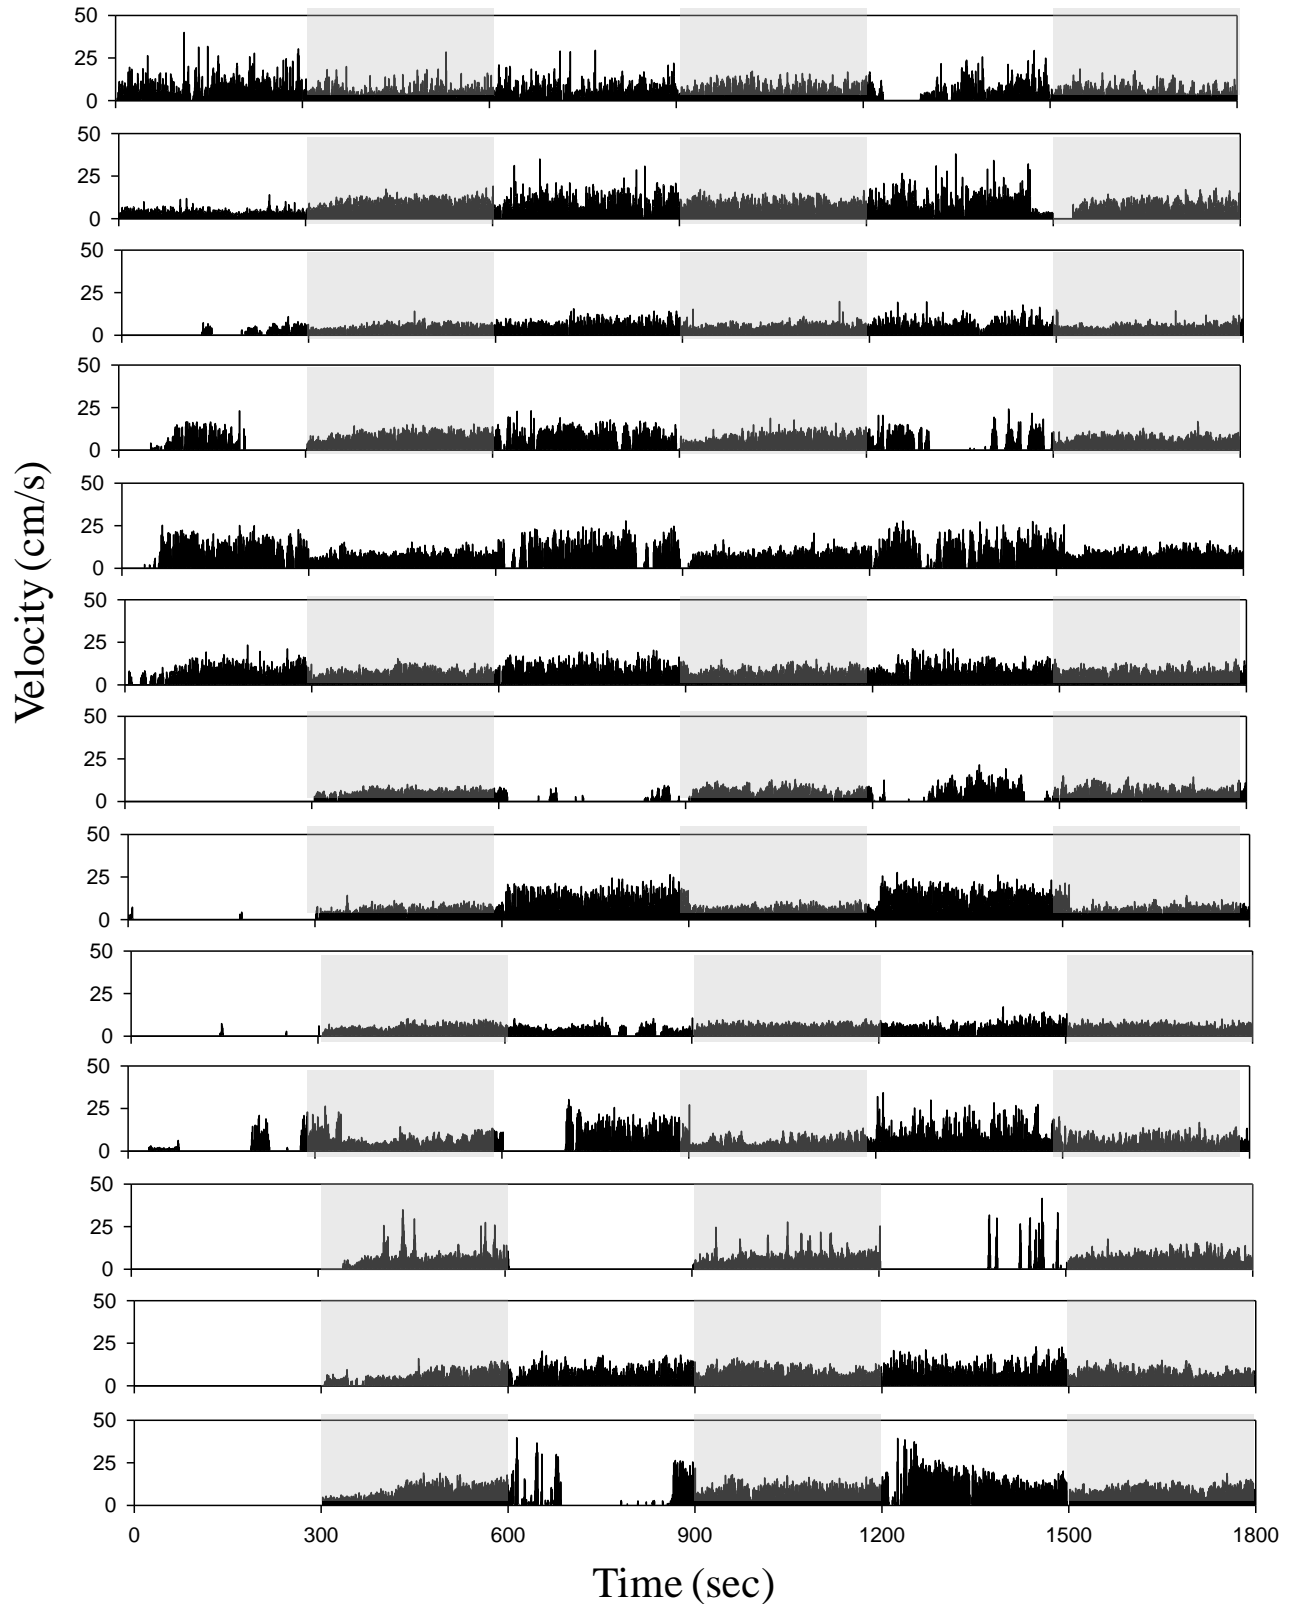

Figure S4. Mean velocities of adult male *Pimphales promelas* exposed to 30  $\mu\text{g}$  sertraline/L during behavioral assays. Calculations determined using NOLDUS software. Each graph shows swim patterns for one fish. White= Periods of Light / Gray = Periods of Dark.
